# Supplementary material for: Ruthenium-catalyzed olefin metathesis accelerated by the steric effect of the backbone substituent in cyclic (alkyl)(amino) carbenes
Source: Royal Society of Chemistry journal article supplement (doi:10.1039/c3cc45823g), 2013-01-01
Supplement: c3cc45823g.pdf [file c3cc45823g.pdf]

## Electronic Supplementary Information for

# Ruthenium-catalyzed Olefin Metathesis Accelerated by Steric Effect of Backbone Substituent in Cyclic (Alkyl)(Amino)Carbenes

Jun Zhang,\*<sup>a</sup> Shangfei Song,<sup>a</sup> Xiao Wang,<sup>a</sup> Jiajun Jiao,<sup>a</sup> and Min Shi\*<sup>a,b</sup>

### Experimental Section

**General Information:** Unless otherwise stated, all reactions and manipulations were performed using standard Schlenk techniques. All solvents were purified by distillation using standard methods. Commercially available reagents were used without further purification. Methyl oleate (96% and 99%) was purchased from J&K Scientific LTD. and passed through activated alumina before use. 2,6-Diethyl-*N*-(2-methylpropylidene)aniline, 2,6-diisopropyl-*N*-(cyclohexylmethylene)aniline, 2,6-diisopropyl-*N*-(2-methylpropylidene)aniline were prepared as previously reported.<sup>1,2</sup> NMR spectra were recorded by using a Varian Mercury vx 300 MHz or Bruker 400 MHz spectrometer in CDCl<sub>3</sub> with tetramethylsilane (TMS) as an internal standard. Mass spectra were recorded on the HP-5989 instrument by EI/ESI methods. X-ray diffraction analysis was performed by using a Bruker Smart-1000 X-ray diffractometer. The GC analyses of reaction mixture were carried out on a flame ionization detector (FID). Column: HP-5 (30 m × 0.32 mm (i.d.) × 0.25 μm). GC and column conditions: injector temperature 280 °C; detector temperature 300 °C; oven temperature, starting temperature 100 °C, hold time 1 min, ramp rate 10 °C/min to 280 °C, hold time 4 min.

- 
1. V. Lavallo, Y. Canac, C. Prasang, B. Donnadieu, G. Bertrand, *Angew. Chem. Int. Ed.* **2005**, *44*, 5705.
  2. D. R. Anderson, V. Lavallo, D. J. O’Leary, G. Bertrand, R. H. Grubbs, *Angew. Chem., Int. Ed.* **2007**, *46*, 7262.

### Preparation of pyrrolidinium salts **3a**~**3c** by literature method<sup>1,2</sup>

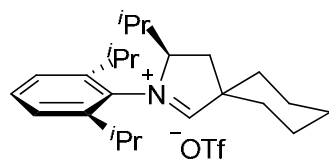

**3a**

LDA (2.05 ml, 4.15 mmol, 2.0 M in THF) was added dropwise to a solution of 2,6-diisopropyl-N-(cyclohexylmethylene)aniline (0.94 g, 3.46 mmol) in Et<sub>2</sub>O (15 mL) at 0 °C. After 20 mins, the mixture was warmed to room temperature and stirred for 4 h. Evacuated the solvent in vacuo and the residue was dissolved in Et<sub>2</sub>O (20 mL), and 2-isopropylloxirane (0.36 g, 4.15 mmol) was added dropwise. After stirring overnight at room temperature, Tf<sub>2</sub>O (1.16 g, 4.15 mmol) was added dropwise at –78 °C. The mixture was warmed to room temperature and stirred for 1 h. The resultant solid was filtered and then washed with Et<sub>2</sub>O (30 ml) to give **3a** as a white solid (0.74 g, 43%). <sup>1</sup>H NMR (400 MHz, CDCl<sub>3</sub>) δ = 9.31 (s, 1H), 7.52 (t, *J* = 8.2 Hz, 1H), 7.31 (dd, *J*<sub>1</sub> = 8.2 Hz, *J*<sub>2</sub> = 8.2, 2H), 4.63 (q, *J* = 7.8 Hz, 1H), 2.71–2.57 (m, 3H), 2.34–2.27 (m, 1H), 2.18, (t, *J* = 12.4 Hz, 1H), 2.07 (dd, *J*<sub>1</sub> = 9.6 Hz, *J*<sub>2</sub> = 9.6, 2H), 1.31 (d, *J* = 6.4 Hz, 3H), 1.29 (d, *J* = 6.4 Hz, 3H), 1.25 (d, *J* = 6.4 Hz, 3H), 1.23 (d, *J* = 6.4 Hz, 3H), 1.00 (d, *J* = 6.8 Hz, 3H), 0.67 (d, *J* = 6.8 Hz, 3H); <sup>13</sup>C NMR (100 MHz, CDCl<sub>3</sub>) δ = 192.4, 143.2, 142.7, 131.9, 131.8, 125.4, 125.3, 120.5 (q, *J* = 318 Hz), 82.1, 53.2, 35.1, 33.2, 29.9, 29.8, 29.2, 25.4, 24.7, 24.3, 24.0, 23.3, 23.0, 22.9, 21.5, 20.9, 20.8, 19.0; HRMS (EI): *m/z* [M – OTf<sup>–</sup>] calcd. for C<sub>24</sub>H<sub>38</sub>N<sup>+</sup>: 340.3004, found: 340.3002.

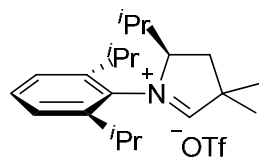

**3b**

LDA (2.05 mL, 4.10 mmol, 2.0 M in THF) was added dropwise to a solution of 2,6-diisopropyl-N-(2-methylpropylidene)aniline (0.8 g, 3.46 mmol) in Et<sub>2</sub>O (15 mL) at 0 °C. After 20 mins, the mixture was warmed to room temperature and stirred for 4 h. Evacuated the solvent in vacuo and the residue was dissolved in Et<sub>2</sub>O (20 mL), and 2-isopropylloxirane (0.36 g, 4.15 mmol) was added dropwise. After stirring overnight at room temperature, Tf<sub>2</sub>O (1.16 g, 4.15 mmol) was added dropwise at –78 °C. The mixture was warmed to room temperature and stirred for 1 h. The resultant solid was filtered and then washed with Et<sub>2</sub>O (30 ml) to give **3b** as a white solid (0.68 g, 47%). <sup>1</sup>H NMR (300 MHz, CDCl<sub>3</sub>) δ = 9.38 (s, 1H), 7.53 (t, *J* = 7.8 Hz, 1H), 7.31 (dd, *J*<sub>1</sub> = 7.8 Hz, *J*<sub>2</sub> = 7.8, 2H), 4.63 (q, *J* = 7.5 Hz, 1H), 2.66–2.50 (m, 3H), 2.14 (dd, *J*<sub>1</sub> = 9.8 Hz, *J*<sub>2</sub> = 9.6 Hz, 1H), 1.93 (sept, *J* = 6.9 Hz, 1H),

1.64 (s, 3H), 1.62 (s, 3H), 1.33 (d,  $J = 7.2$  Hz, 3H), 1.32 (d,  $J = 7.2$  Hz, 3H), 1.24 (d,  $J = 6.9$  Hz, 3H), 1.23 (d,  $J = 6.6$  Hz, 3H), 0.97 (d,  $J = 6.6$  Hz, 3H), 0.63 (d,  $J = 6.8$  Hz, 3H);  $^{13}\text{C}$  NMR (100 MHz,  $\text{CDCl}_3$ )  $\delta$  = 193.5, 143.1, 142.6, 131.9, 131.8, 125.3, 125.2, 120.6 (q,  $J = 310$  Hz), 82.2, 48.1, 39.6, 29.8, 29.2, 29.1, 25.3, 24.8, 24.6, 23.1, 22.9, 22.7, 20.7, 19.1; HRMS (EI):  $m/z$  [ $\text{M} - \text{OTf}^-$ ] calcd. for  $\text{C}_{21}\text{H}_{34}\text{N}^+$ : 300.2691, found: 300.2689.

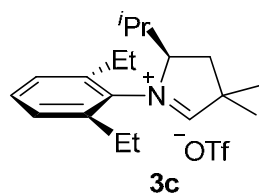

**3c** LDA (2.05 ml, 4.15 mmol, 1.0 M in THF) was added dropwise to a solution of 2,6-diethyl-N-(2-methylpropylidene)aniline (0.78 g, 3.46 mmol) in  $\text{Et}_2\text{O}$  (15 mL) at 0 °C. After 20 mins, the mixture was warmed to room temperature and stirred for 4 h. Evacuated the solvent in vacuo and the residue was dissolved in  $\text{Et}_2\text{O}$  (20 mL), and 2-isopropoxyloxirane (0.36 g, 4.15 mmol) was added dropwise. After stirring overnight at room temperature,  $\text{TiF}_4$  (1.16 g, 4.15 mmol) was added dropwise at -78 °C. The mixture was warmed to room temperature and stirred for 1 h. The resultant solid was filtered and then washed with  $\text{Et}_2\text{O}$  (30 ml) to give **3c** as a white solid (0.57 g, 42 %).  $^1\text{H}$  NMR (400 MHz,  $\text{CDCl}_3$ )  $\delta$  = 9.37 (s, 1H), 7.50 (t,  $J = 7.8$  Hz, 1H), 7.30 (dd,  $J_1 = 7.8$  Hz,  $J_2 = 7.8$  Hz, 2H), 4.78-4.72 (m, 1H), 2.61-2.43 (m, 5H), 2.13 (dd,  $J_1 = 10.0$  Hz,  $J_2 = 10.0$  Hz, 1H), 2.00-1.91 (m, 1H), 1.64 (d,  $J = 14.0$  Hz, 6H), 1.31 (t,  $J = 7.5$  Hz, 6H), 0.91 (d,  $J = 6.8$  Hz, 6H), 0.71 (d,  $J = 6.8$  Hz, 6H);  $^{13}\text{C}$  NMR (100 MHz,  $\text{CDCl}_3$ )  $\delta$  = 193.1, 138.0, 137.4, 133.4, 131.3, 127.4, 127.3, 120.4 (q,  $J = 322$  Hz), 80.6, 47.9, 38.6, 29.3, 24.9, 24.0, 23.9, 23.0, 20.2, , 18.2, 14.4, 14.0; HRMS (EI):  $m/z$  [ $\text{M} - \text{OTf}^-$ ] calcd. for  $\text{C}_{19}\text{H}_{30}\text{N}^+$ : 272.2378, found: 272.2375.

### Preparation of CDDC-Ru complexes 2a~2c by literature method<sup>2</sup>

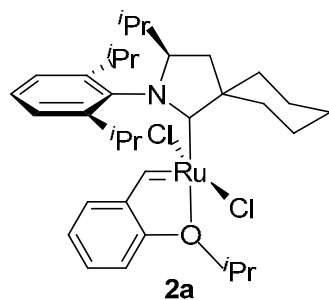

**2a** KHMDS (0.6 mL, 1.0 M in hexane) was added dropwise to a suspension of **3a** (244 mg, 0.5 mmol) and  $\text{RuCl}_2(\text{PCy}_3)(=\text{CH}-o\text{-O}^i\text{PrC}_6\text{H}_4)$  (300 mg, 0.5 mmol) in toluene (5 mL)

at -40°C. After 10 mins, the mixture was warmed to 60°C and stirred for 4 h. Evacuated the solvent in vacuo and the residue was purified by column chromatography on silica gel (PE/EA = 15/1 → 8/1) to give the product **2a** as green powder (119 mg, 37%). <sup>1</sup>H NMR (400 MHz, CDCl<sub>3</sub>) δ = 16.4 (s, 1H), 7.60 (t, *J* = 7.6 Hz, 1H), 7.50 (t, *J* = 7.2 Hz, 1H), 7.42 (dd, *J*<sub>1</sub> = 7.6 Hz, *J*<sub>2</sub> = 7.6, 2H), 6.93 (d, *J* = 8.2 Hz, 1H), 6.85-6.78 (m, 2H), 5.20-5.13 (m, *J* = 6.6 Hz, 1H), 4.13-4.07 (m, 1H), 3.23-3.15 (m, 2H), 3.03-2.94 (m, Hz, 2H), 2.67 (d, *J* = 13.2 Hz, 1H), 2.50-2.45 (m, 1H), 1.99-1.74 (m, 12H), 1.53-1.47 (m, 2H), 1.26 (d, *J* = 6.8 Hz, 3H), 1.17 (d, *J* = 6.8 Hz, 3H), 0.94 (d, *J* = 6.8 Hz, 3H), 0.89 (d, *J* = 6.8 Hz, 3H), 0.64 (d, *J* = 6.8 Hz, 3H), 0.44 (d, *J* = 6.8 Hz, 3H); <sup>13</sup>C NMR (100 MHz, CDCl<sub>3</sub>) δ = 296.4, 268.6, 152.6, 147.3, 146.7, 143.3, 139.6, 130.7, 129.5, 125.5, 125.3, 123.6, 121.8, 113.2, 79.8, 74.9, 61.6, 36.5, 35.8, 29.5, 27.9, 27.6, 26.8, 25.9, 24.9, 24.7, 24.4, 23.4, 22.5, 22.0, 21.9, 20.9; HRMS (EI): *m/z* [M]<sup>+</sup> calcd. for C<sub>34</sub>H<sub>49</sub>Cl<sub>2</sub>NORu: 659.2235, found: 659.2234.

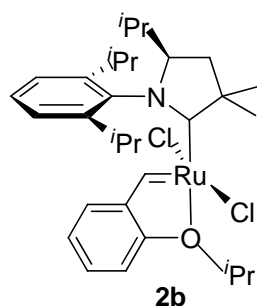

KHMDS (0.6 mL, 1.0 M in hexane) was added dropwise to a suspension of **3b** (224 mg, 0.5 mmol) and RuCl<sub>2</sub>(PCy<sub>3</sub>)(=CH-*o*-*i*PrC<sub>6</sub>H<sub>4</sub>) (300 mg, 0.5 mmol) in toluene (5 mL) at -40°C. After 10 mins, the mixture was warmed to 60°C and stirred for 4 h. Evacuated the solvent in vacuo and the residue was purified by column chromatography on silica gel (PE/EA = 15/1 → 8/1) to give the product **2b** as green powder (120 mg, 42%). <sup>1</sup>H NMR (400 MHz, CDCl<sub>3</sub>) δ = 16.31 (s, 1H), 7.59 (t, *J* = 7.9 Hz, 1H), 7.49 (t, *J* = 6.9 Hz, 1H), 7.42 (dd, *J*<sub>1</sub> = 7.9 Hz, *J*<sub>2</sub> = 7.9, 2H), 6.93 (d, *J* = 8.2 Hz, 1H), 6.86-6.79 (m, 2H), 5.20-5.14 (m, 1H), 4.19-4.13 (m, 1H), 3.03-2.95 (m, 2H), 2.12-2.06 (m, 2H), 2.00-1.90 (m, 1H), 1.83 (d, *J* = 6.4 Hz), 1.74 (d, *J* = 6.0 Hz), 1.27 (t, *J* = 6.8 Hz), 1.19 (d, *J* = 6.4 Hz), 0.90 (d, *J* = 6.4 Hz, 6H), 0.64 (d, *J* = 6.4 Hz, 3H), 0.43 (d, *J* = 6.8 Hz, 3H); <sup>13</sup>C NMR (100 MHz, CDCl<sub>3</sub>) δ = 295.6, 268.8, 152.6, 147.3, 146.8, 143.1, 139.6, 130.6, 129.6, 125.5, 125.3, 123.4, 121.8, 113.1, 79.8, 75.0, 55.9, 43.3, 29.4, 28.3, 28.1, 27.9, 27.6, 26.5, 25.9, 24.9, 24.8, 24.7, 24.4, 24.3, 22.5, 22.3, 22.1, 21.8, 20.8; HRMS (EI): *m/z* [M]<sup>+</sup> calcd. for C<sub>31</sub>H<sub>45</sub>Cl<sub>2</sub>NORu: 619.1922, found: 619.1930.

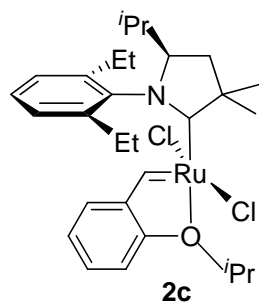

KHMDS (0.6 mL, 1.0 M in hexane) was added dropwise to a suspension of **3c** (216 mg, 0.5 mmol) and  $\text{RuCl}_2(\text{PCy}_3)(=\text{CH}-o\text{-O}^i\text{PrC}_6\text{H}_4)$  (300 mg, 0.5 mmol) in toluene (5 mL) at  $-40^\circ\text{C}$ . After 10 mins, the mixture was warmed to  $60^\circ\text{C}$  and stirred for 4 h. Evacuated the solvent in vacuo and the residue was purified by column chromatography on silica gel (PE/EA = 15/1  $\rightarrow$  8/1) to give the product **2c** as green powder (46 mg, 17%).  $^1\text{H}$  NMR (400 MHz,  $\text{CDCl}_3$ )  $\delta$  = 16.20 (s, 1H), 7.59-7.52 (m, 2H), 7.33 (dd,  $J_1 = 7.2$  Hz,  $J_2 = 7.2$  Hz, 2H), 6.93 (d,  $J = 8.0$  Hz, 1H), 6.85 (s, 2H), 5.19-5.16 (m, 1H), 4.28 (m, 1H), 2.61 (m, 4H), 2.29 (s, 3H), 1.76 (d,  $J = 7.2$  Hz, 6H), 1.20 (m,  $J = 4.8$  Hz, 12H), 0.91 (d,  $J = 6.8$  Hz, 3H), 0.44 (d,  $J = 6.8$  Hz, 3H);  $^{13}\text{C}$  NMR (100 MHz,  $\text{CDCl}_3$ )  $\delta$  = 298.2, 268.1, 152.3, 143.8, 142.6, 141.6, 141.4, 130.7, 129.0, 126.6, 123.6, 121.9, 113.0, 78.5, 74.9, 55.8, 43.8, 30.9, 29.6, 29.5, 27.8, 24.1, 23.3, 22.5, 22.0, 21.9, 21.8, 20.7; HRMS (EI):  $m/z$   $[\text{M}]^+$  calcd. for  $\text{C}_{29}\text{H}_{41}\text{Cl}_2\text{NORu}$ : 591.1609, found: 591.1604.

#### General ring-closing metathesis procedure:

An NMR tube with a rubber septum was charged with 0.80 mL of a  $\text{CD}_2\text{Cl}_2$  (at  $30^\circ\text{C}$ ) or  $\text{C}_6\text{D}_6$  (at  $60^\circ\text{C}$ ) solution of catalyst (0.80  $\mu\text{mol}$ ). After the sample was equilibrated at the appropriate temperature, diolefin (0.080 mmol) was injected into the tube. The reaction was monitored after an appropriate period of time. The conversion was determined by comparing the ratio of the integrals of the methylene protons in the starting material with those in the product.

#### General ethenolysis procedure:

A solution of olefin metathesis catalyst of an appropriate concentration was prepared in dried  $\text{CH}_2\text{Cl}_2$ , and the desired volume of this solution was added to the methyl oleate (3g). The mixture was transferred into a vacuum-dried reaction vessel under ethylene flow. Then the reactor was closed, placed in an oil bath at  $40^\circ\text{C}$ , and pressurized to 150 psi. At the end of each experiment, the reactor

was cooled to 0 °C and depressurized. A small sample was passed over a short silica plug and analyzed by GC.



3b

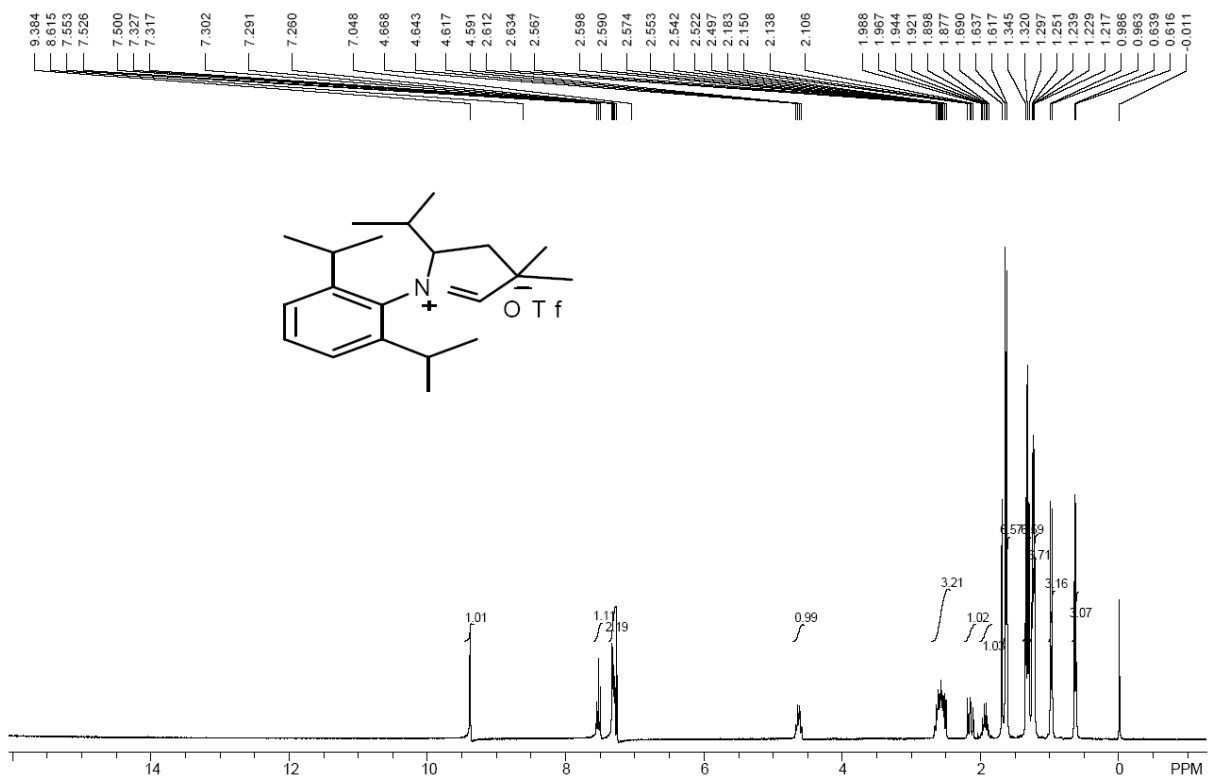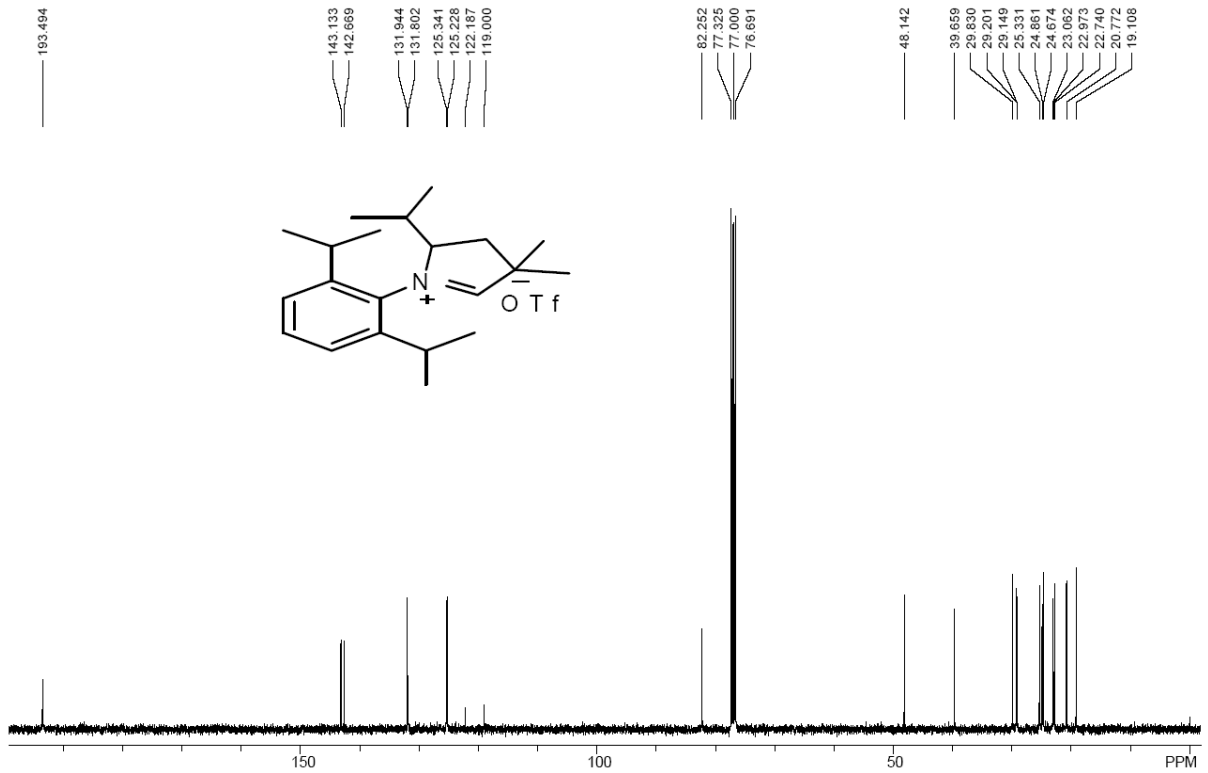

3c

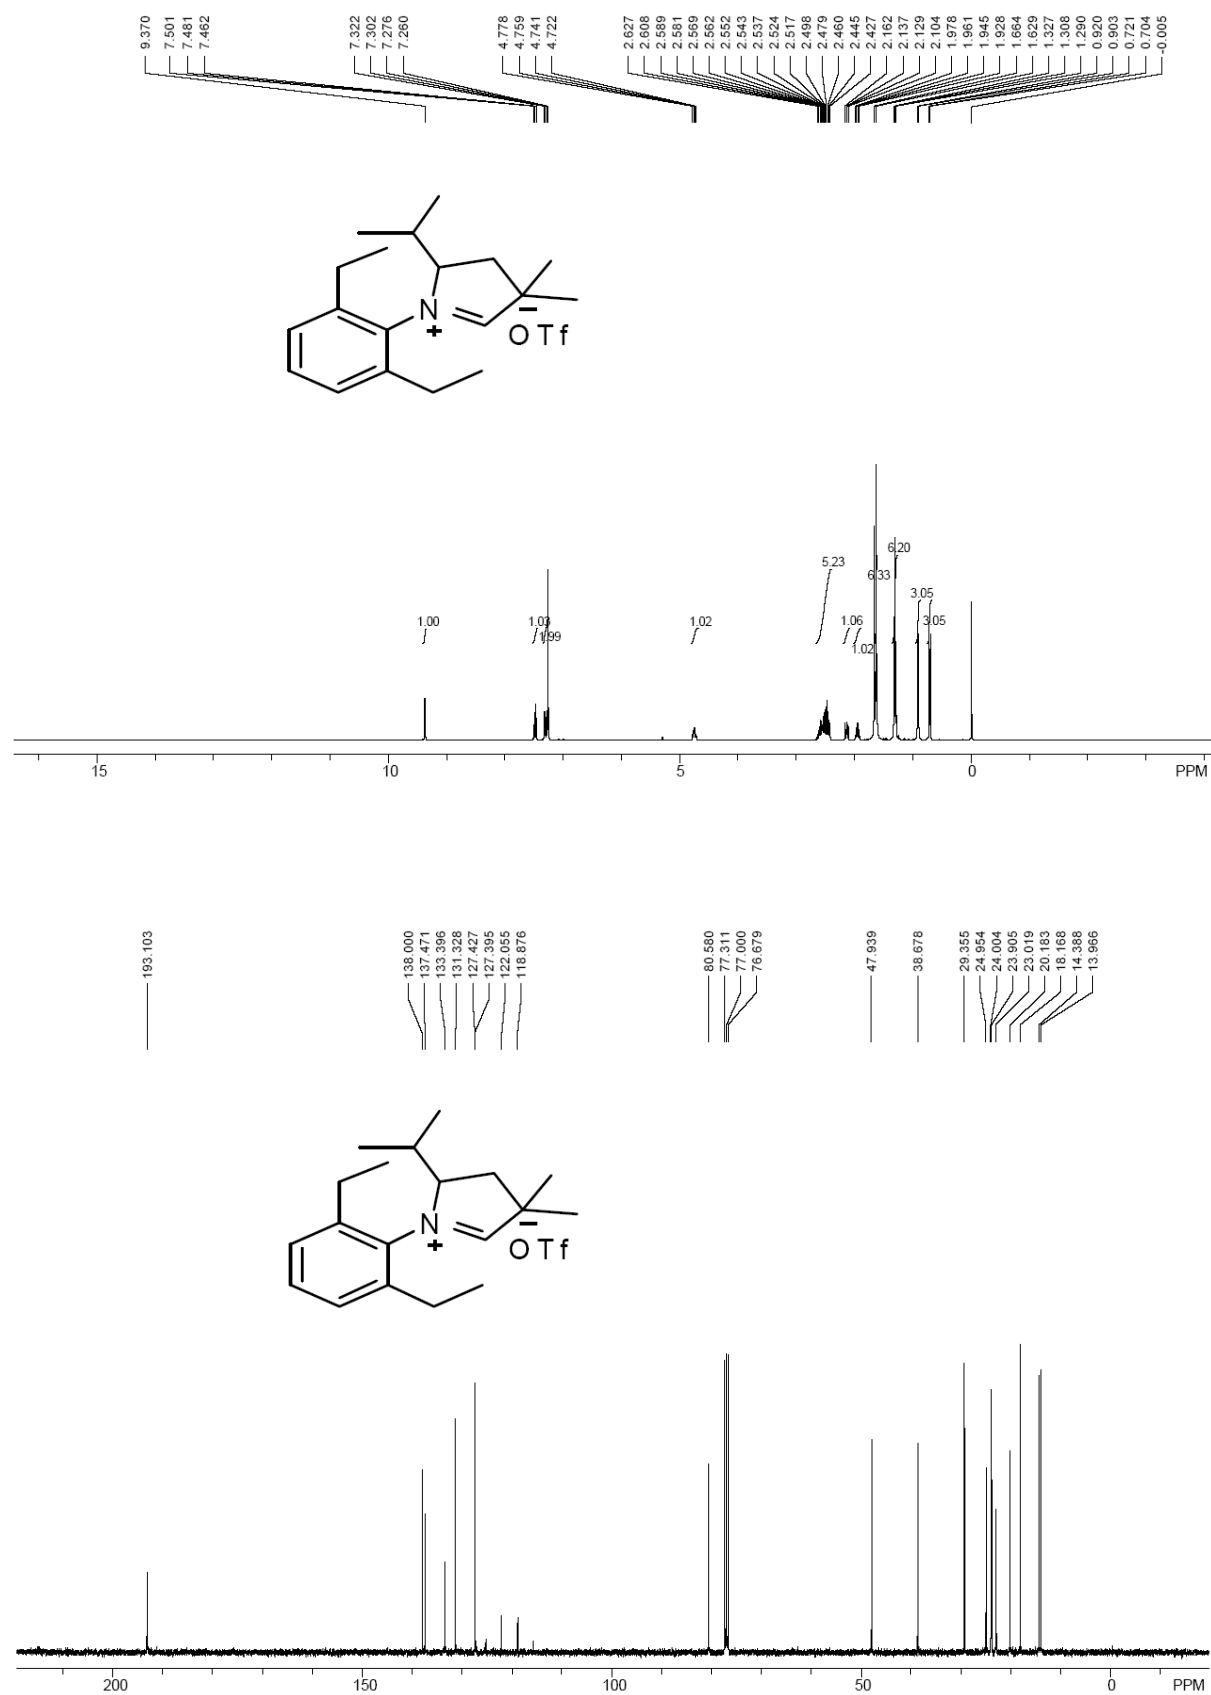

2a

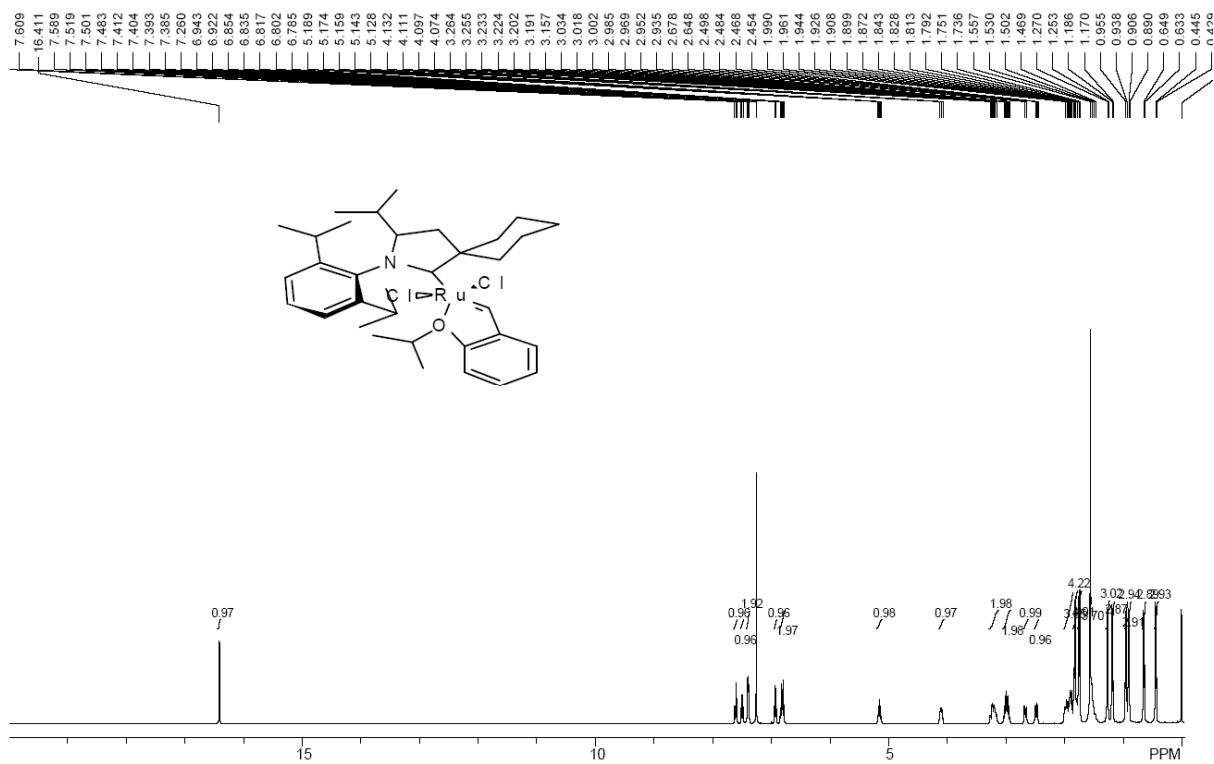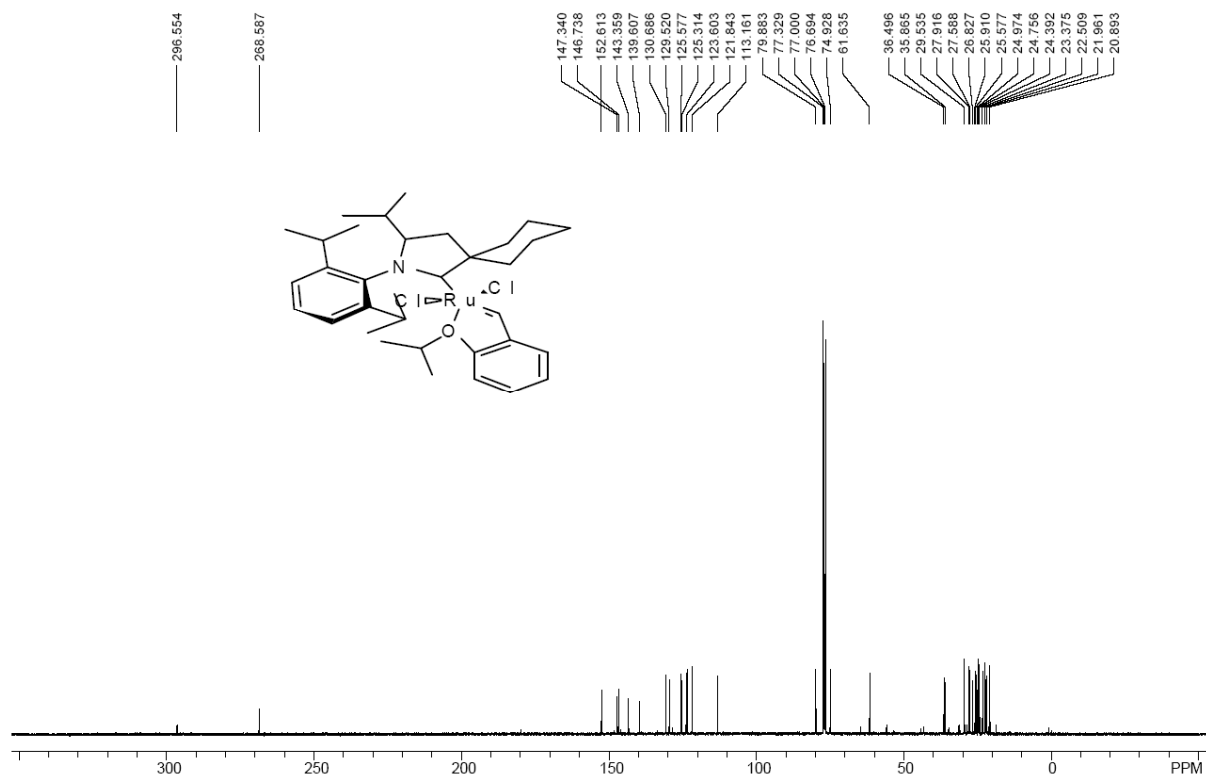

2b

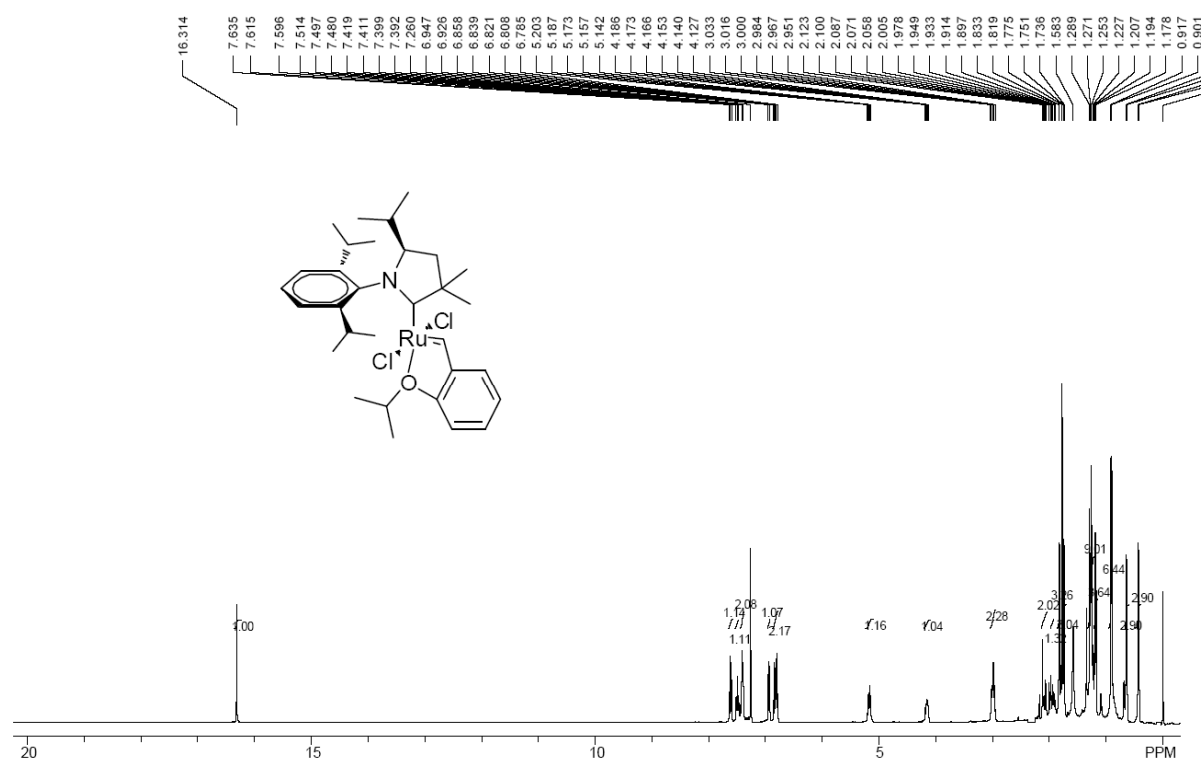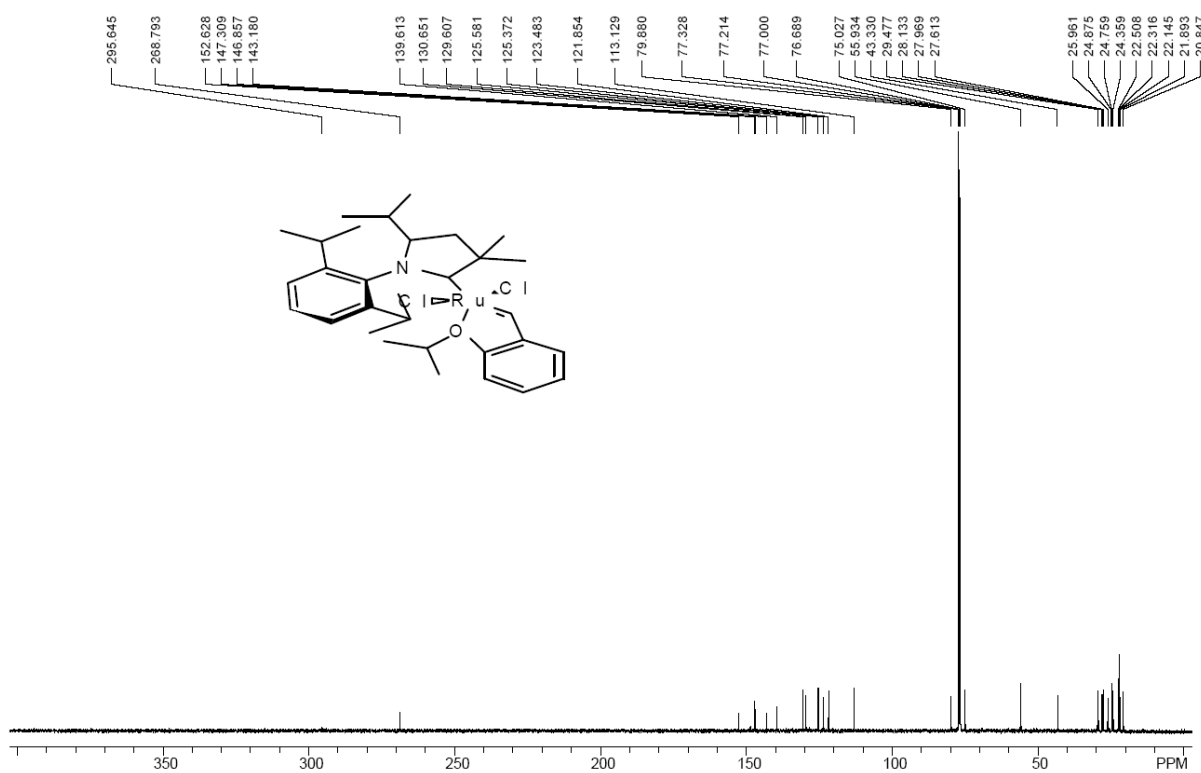

2c

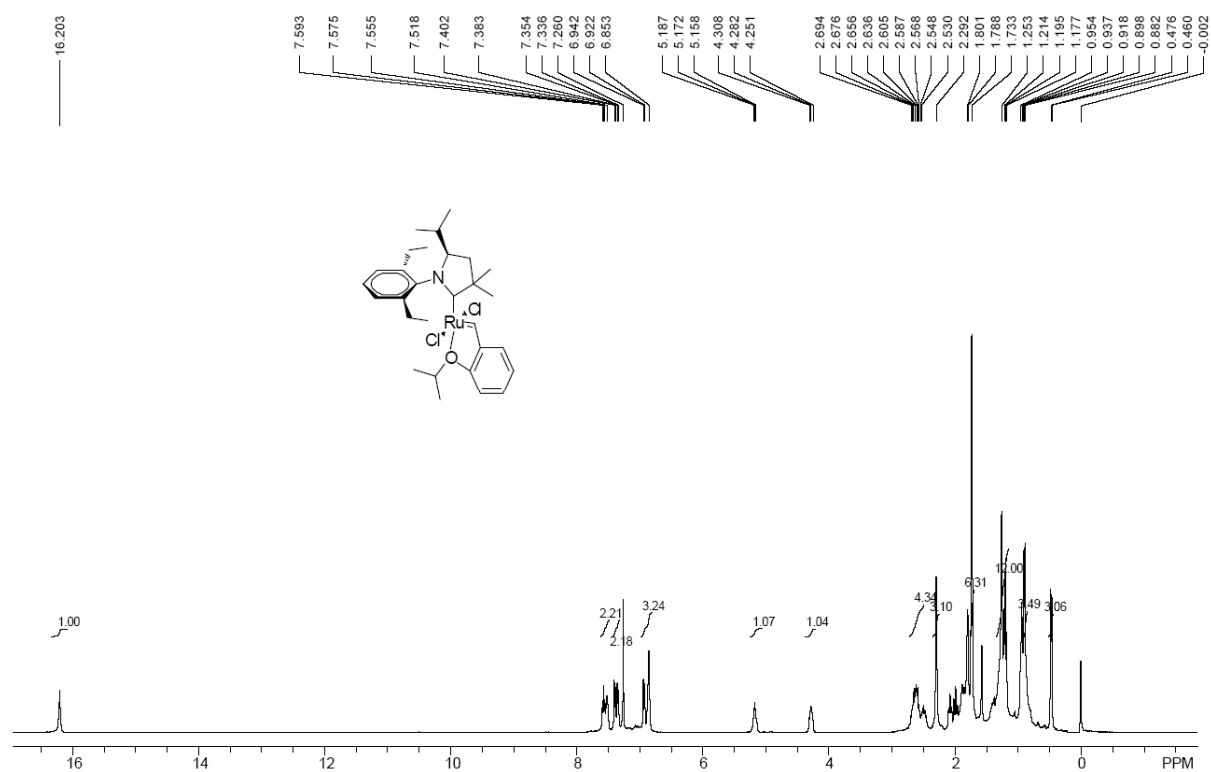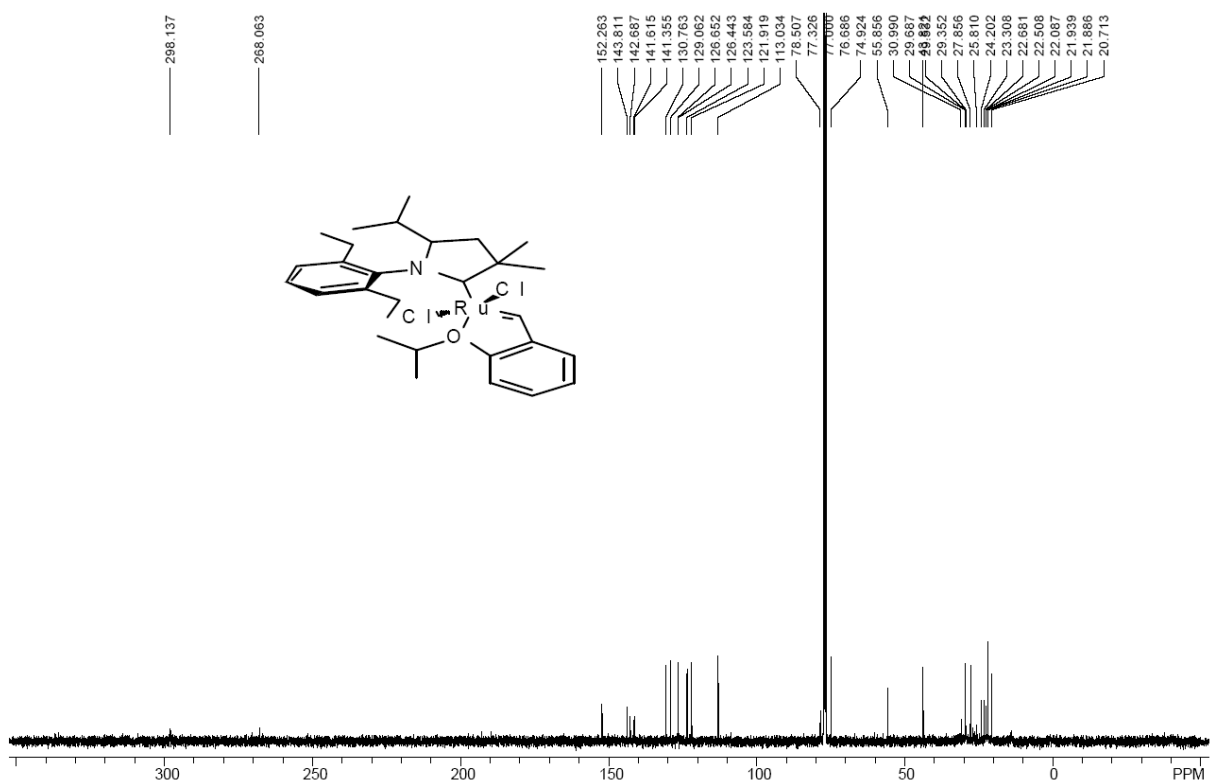

### X-Ray Crystallography.

Crystallographic measurements were made on a Bruker Smart Apex 100 CCD area detector using graphite monochromated Mo-K $\alpha$  radiation ( $\lambda_{\text{Mo-K}\alpha} = 0.71073 \text{ \AA}$ ). The structures were solved by directed methods (SHELXS-97) and refined on  $F^2$  by full-matrix least squares (SHELX-97) using all unique data. All the calculations were carried out with the SHELXTL18 program.<sup>3</sup>

Key details of the crystal and structure refinement data are summarized in Table S1–S2. Further crystallographic details may be found in the respective CIF files, which were deposited at the Cambridge Crystallographic Data Centre, Cambridge, UK. The CCDC reference numbers for **2a** was assigned as 938870.

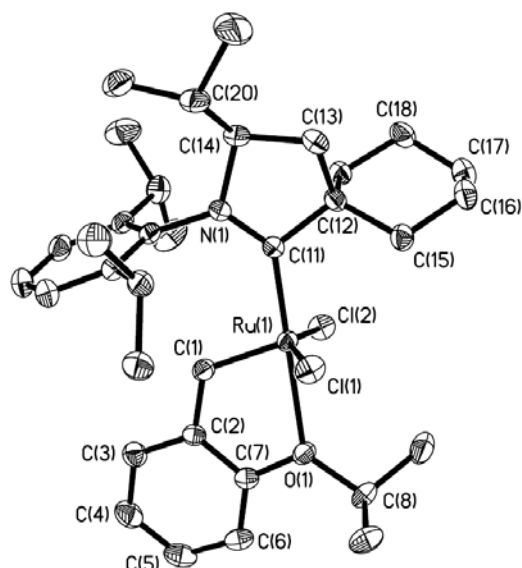

**Figure S1** Views of the single-crystal structure of Ru complex **2a**. H atoms have been omitted for clarity.

3. G. M. Sheldrick, SHELX-97, Program for crystal structure refinement, University of Göttingen: Göttingen, Germany, 1997.

**Table S1.** Crystal Data, Data Collection, and Structure Refinement for **2a**

|                                                                       | <b>2a</b>                                            |
|-----------------------------------------------------------------------|------------------------------------------------------|
| Identification code                                                   | a11202b                                              |
| Formula                                                               | C <sub>34</sub> H <sub>49</sub> Cl <sub>2</sub> NORu |
| Formula weight                                                        | 659.71                                               |
| <i>T</i> , K                                                          | 293(2)                                               |
| crystal system                                                        | Orthorhombic                                         |
| space group                                                           | P2(1)2(1)2(1)                                        |
| <i>a</i> , Å                                                          | 10.914(4)                                            |
| <i>b</i> , Å                                                          | 11.526(4)                                            |
| <i>c</i> , Å                                                          | 26.138(9)                                            |
| $\alpha$ , deg                                                        | 90                                                   |
| $\beta$ , deg                                                         | 90                                                   |
| $\gamma$ , deg                                                        | 90                                                   |
| Volume, Å <sup>3</sup>                                                | 3288(2)                                              |
| <i>Z</i>                                                              | 4                                                    |
| <i>D</i> <sub>calc</sub> , Mg / m <sup>3</sup>                        | 1.333                                                |
| absorption<br>coefficient, mm <sup>-1</sup>                           | 0.665                                                |
| F(000)                                                                | 1384                                                 |
| crystal size, mm                                                      | 0.20 x 0.15 x 0.12                                   |
| 2 $\theta$ range, deg                                                 | 1.56 to 27.01                                        |
| reflections<br>collected /unique                                      | 15624 / 6903                                         |
| [R(int) = 0.0272]                                                     |                                                      |
| data / restraints /<br>parameters                                     | 6903 / 0 / 360                                       |
| goodness of<br>fit on F <sup>2</sup>                                  | 1.005                                                |
| final R indices<br>[ <i>I</i> > 2 $\sigma$ ( <i>I</i> )] <sup>a</sup> | R1 = 0.0238,<br>wR2 = 0.0525                         |
| R indices (all data)                                                  | R1 = 0.0260,<br>wR2 = 0.0532                         |
| lgst diff peak<br>and hole, e/Å <sup>3</sup>                          | 0.316 and -0.258                                     |
